# Supplementary material
Source: publisher figshare collection journal article supplement (https://acs.figshare.com/ndownloader/files/5686383)
Supplement: Supplementary file 1 [file 5686383]

### Competitive Isotherm Prediction under Polanyi-Based Modeling Assumptions

Shown herein are equations for predicting the adsorbed-phase concentrations of two competing adsorbates in a water/sorbent system. These equations allow the prediction of the complete competitive adsorption isotherm for a sorbate of primary interest ("solute 1"), at any given known initial concentration of co-solute ("solute 2"), and for any given values of sorbent mass and water volume. It is assumed that the Polanyi-Manes modeling approaches described in our previous publication (5) apply, that single-solute isotherm parameters for both solutes have been previously determined on the same sorbent, and that non-sorption "losses" of sorbate 2 are proportional to final liquid concentration, with a known coefficient of proportionality (previously determined from blank samples). The equations shown here apply under the six conceptual assumptions cited above Equation (4) in the main text -- *i.e.*, the "uniform adsorbate" assumptions of Greenbank and Manes (36) and, for solid-liquid systems, the "immiscible model" assumptions of Greenbank and Manes (37).

The predictive modeling equations under the above assumptions are given below. (Minor modifications for some alternative assumptions for liquid-solid systems are given in the main text.)

$$C_1^b = z_1 C_1^s \quad (S-1)$$

$$C_2^b = z_2 C_2^s \quad (S-2)$$

$$z_1 + z_2 = 1 \quad (S-3)$$

$$q_T^{b'} = \frac{q_1^{s'}}{\eta_{p,1}} = \frac{q_2^{s'}}{\eta_{p,2}} = Q_o \times 10^{[a_1' (\frac{E_{sw,1}^s}{V_{s,1}})^{b_1'}]} \quad (S-4)$$

$$q_T^{b'} = q_1^{b'} + q_2^{b'} \quad (S-5)$$

$$q_1^{b'} = q_T^{b'} \times \frac{z_1 V_{s,1} / \eta_{p,1}}{z_1 V_{s,1} / \eta_{p,1} + z_2 V_{s,2} / \eta_{p,2}} \quad (S-6)$$

$$q_2^{b'} = q_T^{b'} \times \frac{z_2 V_{s,2} / \eta_{p,2}}{z_1 V_{s,1} / \eta_{p,1} + z_2 V_{s,2} / \eta_{p,2}} \quad (S-7)$$

where  $C_1^b$  and  $C_2^b$  are the equilibrium concentrations of solute 1 and 2 in the binary solute systems, respectively;  $q_T^{b'}$  is the total adsorption volume;  $C_1^s$  and  $C_2^s$  are the hypothetical aqueous concentrations for the single solute systems with the same total adsorption volume ( $q_T^{b'}$ );  $q_1^s$  and  $q_2^s$  are the adsorption volume for solute 1 and 2 in single solute systems with the hypothetical aqueous concentrations ( $C_1^s$  and  $C_2^s$ ), respectively;  $q_1^{b'}$  and  $q_2^{b'}$  are the adsorption volume for solute 1 and 2 in binary solute systems, respectively;  $z_1$  and  $z_2$  are the molar fractions for solute 1 and 2, respectively;  $Q_0'$  is the maximum adsorption volume for all liquid adsorbates;  $a_i'$ ,  $b_i'$  are the single solute isotherm parameters;  $V_{s,i}$  is the molar volume (of pure chemical); and  $\eta_{p,i}$  is the packing efficiency, defined as the ratio of maximum adsorbed volume of a solid chemical to that for liquid chemicals. Note that  $\eta_{p,i}$  will be equal to 1 for all chemicals that are normally liquids at the temperature of adsorption, and that  $\eta_{p,i}$  values for solid chemicals will be as independently estimated on the basis of single solute isotherms.  $V_{s,i}/\eta_{p,i}$  may be referred to as the adsorbed molar volume.

From Equation (S-4), we obtain:

$$Q_0 \times 10^{[a_1'(\frac{\epsilon_{sw,1}^s}{V_{s,1}})^{b_1'}]} = Q_0 \times 10^{[a_2'(\frac{\epsilon_{sw,2}^s}{V_{s,2}})^{b_2'}]} \quad (S-8)$$

Then,

$$a_1'(\frac{\epsilon_{sw,1}^s}{V_{s,1}})^{b_1'} = a_2'(\frac{\epsilon_{sw,2}^s}{V_{s,2}})^{b_2'} \quad (S-9)$$

$$(\frac{\epsilon_{sw,2}^s}{V_{s,2}}) = [\frac{a_1'}{a_2'}(\frac{\epsilon_{sw,1}^s}{V_{s,1}})^{b_1'}]^{1/b_2'} = \{\frac{a_1'}{a_2'}[\frac{2.303RT}{V_{s,1}} \times \log(\frac{z_1 S_{w,1}}{C_1^b})]^{b_1'}\}^{1/b_2'} \quad (S-10)$$

According to the definition of adsorption potential for solute 2 and Equation (S-2), we can have the following equation.

$$(\frac{\epsilon_{sw,2}^s}{V_{s,2}}) = \frac{2.303RT}{V_{s,2}} \times \log(\frac{z_2 S_{w,2}}{C_2^b}) \quad (S-11)$$

$$\frac{z_2 S_{w,2}}{C_2^b} = 10^{(\frac{\epsilon_{sw,2}^s}{2.303RT})} \quad (S-12)$$

$$C_2^b = z_2 S_{w,2} \times 10^{(-\frac{\epsilon_{sw,2}^s}{2.303RT})} = (1 - z_1) \times S_{w,2} \times 10^{(-\frac{\epsilon_{sw,2}^s}{2.303RT})} \quad (S-13)$$

A mass balance conducted for solute 2 with initial concentration  $C_2^0$  gives

$$q_2^b \times \rho_2 = \frac{VC_2^0}{M} - \left( \frac{V+X}{M} + K_{p,2} \right) C_2^b \quad (\text{S-14})$$

Here,  $V$  is the solution volume in the sorption vial;  $M$  is the sorbent mass;  $K_{p,2}$  is the partition coefficient for the co-solute; and  $X$  is an effective volume increment, used to account for solute loss when these are proportional to the final aqueous concentration.  $X$  is an empirical term that is estimated from separate experiments with blank samples.

By replacing  $q_2^b$  with Equations (S-7) and (S-4), and  $C_2^b$  with Equation (S-13), the final equation is obtained.

$$\begin{aligned} & \frac{(1-z_1)V_{s,2}/\eta_{p,2}}{z_1V_{s,1}/\eta_{p,1} + (1-z_1)V_{s,2}/\eta_{p,2}} \times Q_0 \times 10^{[a_2 \left( \frac{\epsilon_{sw,2}^s}{V_{s,2}} \right)^{b_2'}]} \times \rho_2 - \\ & \frac{VC_2^0}{M} + \left( \frac{V+X}{M} + K_{p,2} \right) (1-z_1) \times S_{w,2} \times 10^{\left[ -\frac{\epsilon_{sw,2}^s}{2.303RT} \right]} = 0 \end{aligned} \quad (\text{S-15})$$

in which,  $\rho_2$  is the density of co-solute 2, and  $\epsilon_{sw,2}^s$  is given by Equation (S-7). For any given  $C_1^b$ ,  $z_1$  can be solved, and  $C_1^s$  then can be calculated from Equation (S-1).

Predictive values of adsorbed volumes then can be determined using Equations (S-4) through (S-7). With the addition of the unaffected linear partitioning component, the overall sorption isotherms can be predicted.
